# Supplementary material
Source: publisher site journal article supplement (https://www.dovepress.com/article/320721)
Supplement: Supplementary file 1 [file get_supplementary_file.php]

**Supplementary files used in research conducted on NPC in patient care in Eastern Ethiopia, 20219**

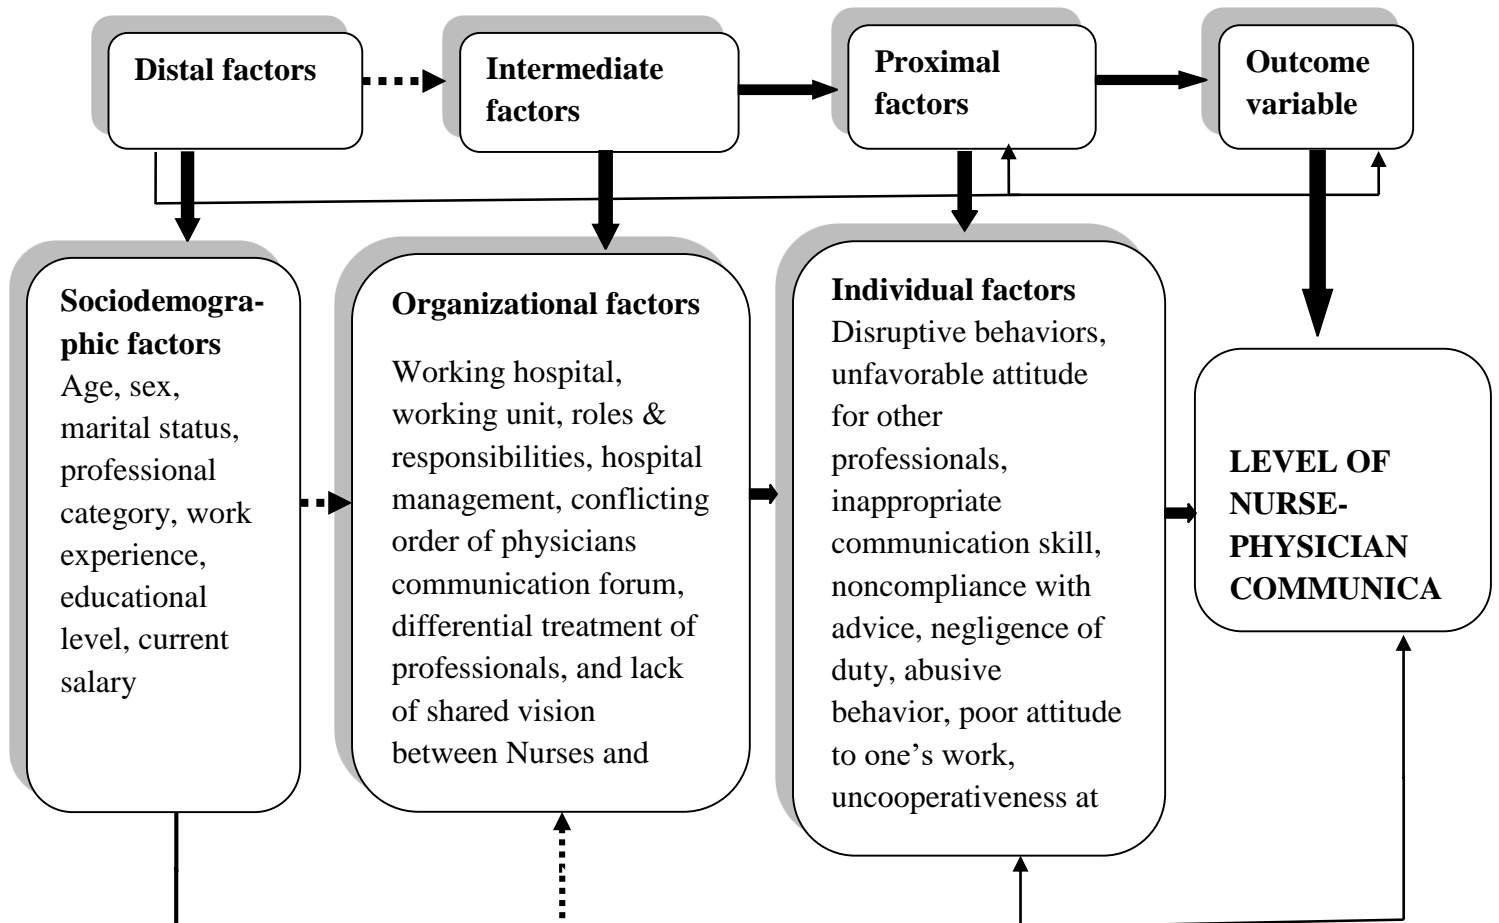

**Supplementary file 1:** Conceptual framework of factors that affect level of NPC among Nurses and Physicians working at public hospitals of Harari Regional State and Dire Dawa Administration, Eastern Ethiopia, 2019.

**Source:** Developed by reviewing different related literatures (Ogbimi and Adebamowo, 2006; Aghamolaei *et al.*, 2012; Hakami and Hamdi, 2013; Fikadu *et al.*, 2016; Mukeshimana M. and Asingizwe D, 2016; Amudha P. *et al.*, 2018).

**Supplementary File 2:** Reported reasons of the qualitative study that affects level of NPC in patient care among key informants of Nurses and Physicians in public hospitals of Harari Regional State and Dire city Dawa Administration, Eastern Ethiopia, 2019

| <b>Themes (subcategories)</b>                        | <b>Categories</b>                           | <b>Examples</b>                                                                                                                      |
|------------------------------------------------------|---------------------------------------------|--------------------------------------------------------------------------------------------------------------------------------------|
| <b>Working environment/ organizational/ factors</b>  | Non-professional duties                     | “Sometimes some guest physicians order us non-nursing activities”                                                                    |
|                                                      | Shortage of staffs                          | “Lack in number of staffs from both Nurses and Physicians to some working units”                                                     |
|                                                      | Supplies of medical equipment               | “Lack in accessing of the necessary medical supplies on time”                                                                        |
|                                                      | Hospital recognition and management system  | “Disorganized hospital management system”<br>“Hospital recognition for those hard workers”                                           |
| <b>Work performance and attitude related factors</b> | Negligence of Duties and responsibilities   | “Failure of physicians in writing order on the order sheet”                                                                          |
|                                                      | Theoretical and practical variation at work | “Professionals should focus to the practice besides their background knowledge”                                                      |
| <b>Professionals’ value for communication</b>        | Multi-disciplinary round communication      | “Rounds which involves Nurses, Physicians and Clinical Pharmacists”                                                                  |
|                                                      | Unfamiliarity of professionals              | “Not having inclusive and frequent meeting between Nurses and Physicians”                                                            |
|                                                      | Absence of giving concern for communication | “Absence or lack in inter-professional communication”                                                                                |
| <b>Professionals’ personal behavior attributes</b>   | Disruptive behaviors of professionals       | ”Avoid personal character at work place”,<br>“shifting of behavior by the professionals”<br>“negative attitude to other professions” |
|                                                      | Power of authority                          | “Feeling of Inferiority-superiority complex syndrome”                                                                                |
